# Supplementary material for: Using eDNA to detect the distribution and density of invasive crayfish in the Honghe-Hani rice terrace World Heritage site
Source: PLoS One. 2017 May 15;12(5):e0177724. doi: 10.1371/journal.pone.0177724 (PMC5432173; doi:10.1371/journal.pone.0177724)
Supplement: S2 Table — (CSV) [file pone.0177724.s003.csv]

CCT	CT		DILUTION
51.14566285	19.552	standard	-1
52.74539796	18.959	standard	-1
52.48517294	19.053	standard	-1
52.55965521	19.026	standard	-1
52.49343832	19.05	standard	-1
52.66206751	18.989	standard	-1
52.46864998	19.059	standard	-1
52.69814503	18.976	standard	-1
52.77323342	18.949	standard	-1
52.68981506	18.979	standard	-1
45.11006857	22.168	standard	-2
43.19281272	23.152	standard	-2
44.88531801	22.279	standard	-2
44.96807267	22.238	standard	-2
44.90749057	22.268	standard	-2
45.05519261	22.195	standard	-2
45.13246378	22.157	standard	-2
45.08363013	22.181	standard	-2
45.05316273	22.196	standard	-2
45.032874	22.206	standard	-2
38.88176057	25.719	standard	-3
38.71767074	25.828	standard	-3
38.69070649	25.846	standard	-3
38.62793572	25.888	standard	-3
38.68920958	25.847	standard	-3
38.87722572	25.722	standard	-3
38.86211721	25.732	standard	-3
38.85003885	25.74	standard	-3
38.83193538	25.752	standard	-3
38.85909691	25.734	standard	-3
34.20323563	29.237	standard	-4
34.10408567	29.322	standard	-4
33.92475489	29.477	standard	-4
34.11339292	29.314	standard	-4
34.04603023	29.372	standard	-4
33.95701042	29.449	standard	-4
33.89256058	29.505	standard	-4
34.0634261	29.357	standard	-4
33.86157389	29.532	standard	-4
33.96508389	29.442	standard	-4
30.21239312	33.099	standard	-5
30.42380358	32.869	standard	-5
30.6438268	32.633	standard	-5
30.28834504	33.016	standard	-5
30.32048755	32.981	standard	-5
26.48094696	37.763	standard	-5
30.30578537	32.997	standard	-5
30.19050207	33.123	standard	-5
30.69933075	32.574	standard	-5
29.54122478	33.851	standard	-5
30.021916	33.309	standard	-5
27.46196518	36.414	standard	-6
26.9179004	37.15	standard	-6
28.4559786	35.142	standard	-6
27.55048627	36.297	standard	-6
27.88078178	35.867	standard	-6
26.59645203	37.599	standard	-6
27.97515806	35.746	standard	-6
27.64110786	36.178	standard	-6
28.245396	35.404	standard	-6
28.11595018	35.567	standard	-6
26.41100811	37.863	standard	-7
26.37687276	37.912	standard	-7
27.84662081	35.911	standard	-7
26.47183397	37.776	standard	-7
26.38452811	37.901	standard	-7
20.16616923	49.588	standard	-8
25.72942932	38.866	standard	-8
23.96702138	41.724	standard	-8
